# Supplementary material for: γ-PGA hydrogel loaded with cell-free fat extract promotes the healing of diabetic wounds
Source: Royal Society of Chemistry journal article supplement (doi:10.1039/d0tb01190h), 2020-01-01
Supplement: d0tb01190h1.pdf [file d0tb01190h1.pdf]

Supporting information for

**$\gamma$ -PGA hydrogel loaded with cell-free fat extract promotes the  
healing of diabetic wounds**

Mengting Yin<sup>1</sup>, Xiangsheng Wang<sup>2</sup>, Ziyou Yu<sup>2</sup>, Yun Wang<sup>2</sup>, Xiansong Wang<sup>2\*</sup>,  
Mingwu Deng<sup>2</sup>, Danyang Zhao<sup>1</sup>, Shaowei Ji<sup>1</sup>, Nengqing Jia<sup>1\*</sup> and Wenjie Zhang<sup>2\*</sup>

<sup>1</sup>The Education Ministry Key Laboratory of Resource Chemistry, Shanghai Key Laboratory of Rare Earth Functional Materials, College of Chemistry and Materials Science, Shanghai Normal University, Shanghai 200234, PR China

<sup>2</sup>Department of Plastic and Reconstructive Surgery, Shanghai Ninth People's Hospital, Shanghai Jiao Tong University School of Medicine, Shanghai Key Laboratory of Tissue Engineering, Shanghai 200011, China

**\*Corresponding author**

E-mail: [wonderluis@126.com](mailto:wonderluis@126.com) (Xiansong Wang); [nqjia@shnu.edu.cn](mailto:nqjia@shnu.edu.cn) (Nengqin Jia);  
[wenjieboshi@aliyun.com](mailto:wenjieboshi@aliyun.com) (Wenjie Zhang)

**Supplementary Figures**

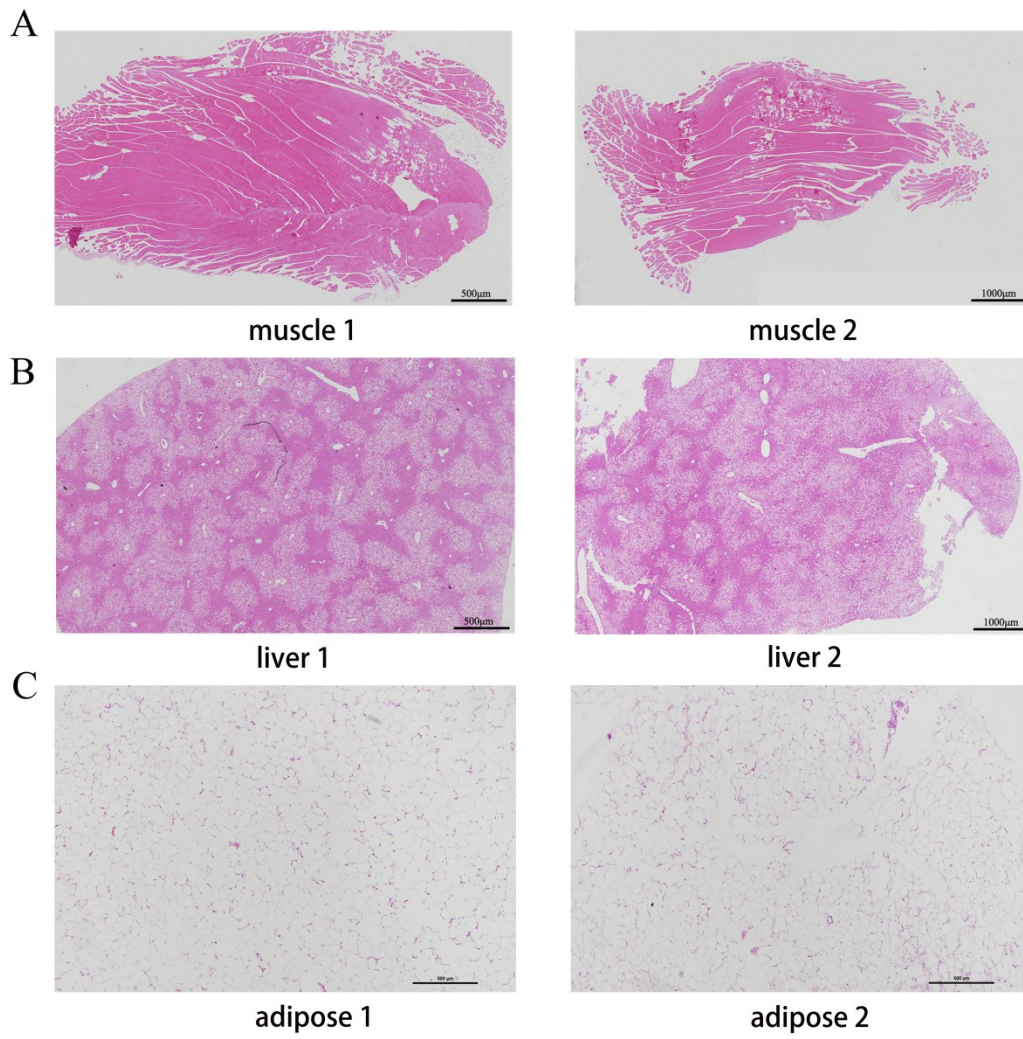

Figure S1. Images of H&E staining of normal liver, muscle, and adipose tissue from Caffe-treated mice.
